# Supplementary material
Source: ML conference proceedings conference paper supplement (https://openreview.net/forum?id=7Ntft3U7jj)

# What's Behind the Mask: Understanding Masked Graph Modeling for Graph Autoencoders

Jintang Li, Ruofan Wu, Wangbin Sun, Liang Chen\*,  
Sheng Tian, Liang Zhu, Changhua Meng, Zibin Zheng, Weiqiang Wang

## Motivation

- Self-supervised learning is a successful learning paradigm for graph neural networks (GNNs).
- Masked autoencoding has shown promise in benefiting visual and language representation learning.
- It is natural to incorporate the masked autoencoding scheme into graph autoencoders (GAEs) --- a class of generative graph self-supervised models.
- However, it is currently unclear whether masked autoencoding would advance the state-of-the-art in graph self-supervised learning.

## Focus: Graph Self-supervised Learning

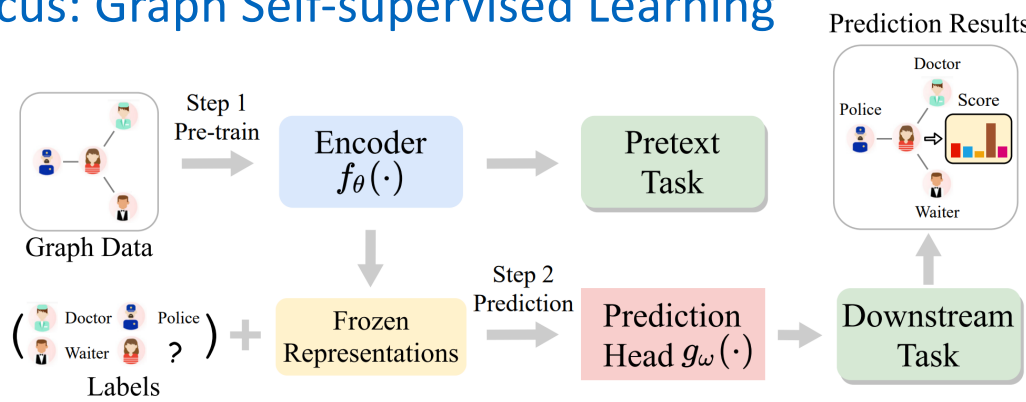

Figure: An illustrative example of graph self-supervised learning.

- GNN  $\rightarrow$  training with self-defined pretext task  $\rightarrow$  encoder  $f_\theta$
- Encoder  $f_\theta \rightarrow$  representations  $\rightarrow$  generalize to other downstream tasks

## Masked Autoencoders

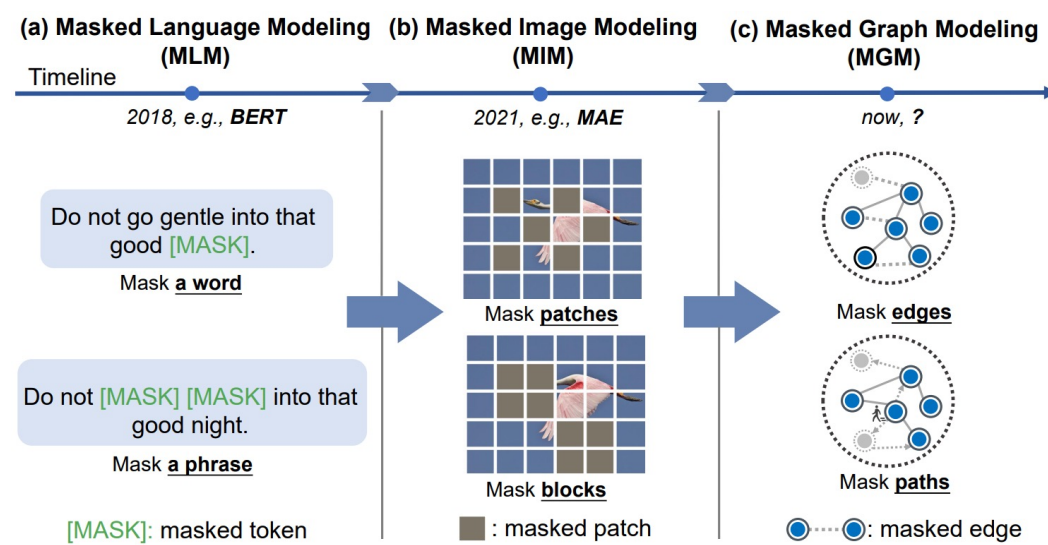

Figure: Milestones of masked autoencoding in language, vision, and graph research.

- Masked language modeling (MLM) and masked image modeling (MIM) have been widely applied to text and image data, with prominent examples including BERT and MAE.
- Similarly, masked graph modeling (MGM) is to remove a portion of the input graph and learn to predict the removed content such as edges or paths.

## Connecting GAEs to Contrastive Learning

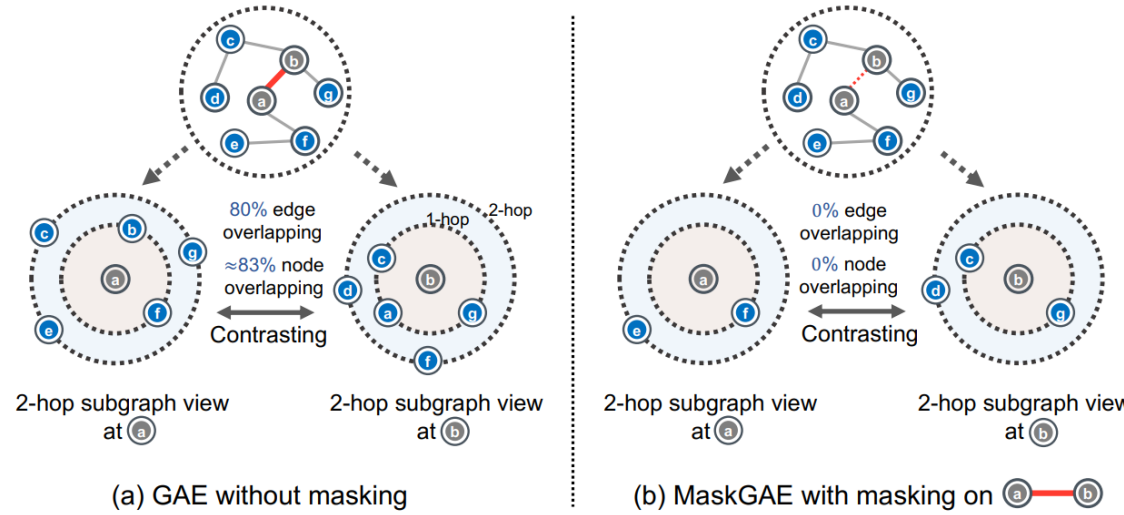

Figure: The benefits of masking on graphs.

- Self-supervised learning in GAEs is provably contrastive learning.
- GAEs with masking can benefit contrastive learning by significantly reducing subgraph overlapping.

## Masking on Graphs

- Edge-wise masking: randomly mask a set of edges from graphs.
- Path-wise masking: mask a continuous of region of edges from graphs.
- Path-wise masking can break the short-range connections between nodes and facilitate the MGM task.

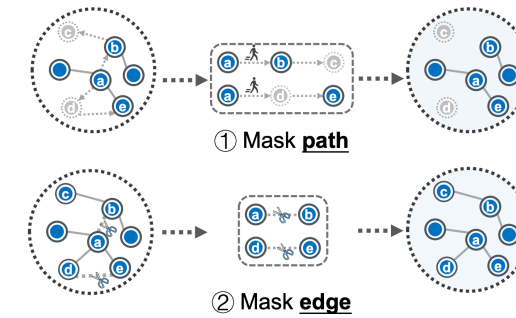

Figure: Two masking strategies on graphs

## Present Work: MaskGAE

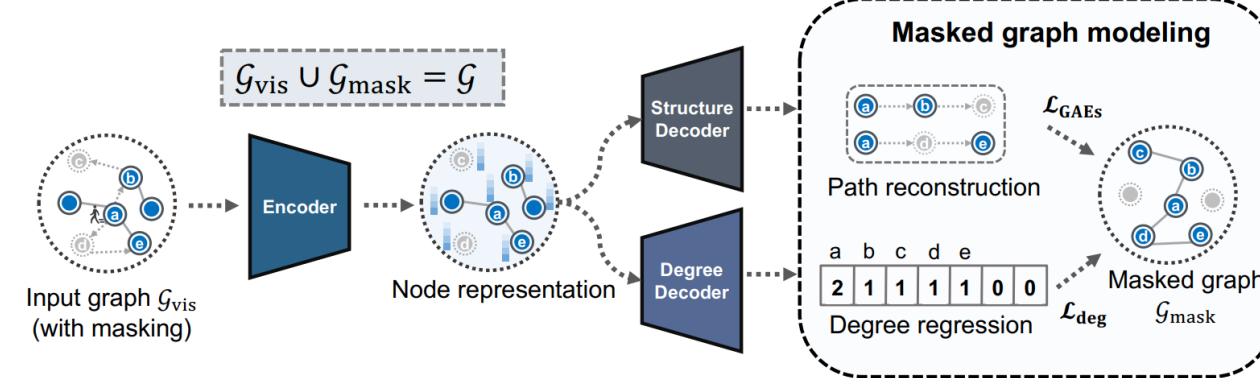

Figure: Overall framework of MaskGAE (with path-wise masking).

- Input masking: edge-wise or path-wise masking strategies.
- Encoder: GNNs, e.g., GCN or GAT.
- Two decoders:
  - Structure decoder: reconstruct graph structure (neighborhood connection).
  - Degree decoder: reconstruct node degree (neighborhood distribution).
- Two learning objectives: reconstruction loss and regression loss.

## Experimental Results

### Link Prediction

|                         | Cora             |                  | CiteSeer         |                  | Pubmed           |                  | Collab           |
|-------------------------|------------------|------------------|------------------|------------------|------------------|------------------|------------------|
|                         | AUC              | AP               | AUC              | AP               | AUC              | AP               | Hit@50           |
| GAE                     | 91.09 $\pm$ 0.01 | 92.83 $\pm$ 0.03 | 90.52 $\pm$ 0.04 | 91.68 $\pm$ 0.05 | 96.40 $\pm$ 0.01 | 96.50 $\pm$ 0.02 | 47.14 $\pm$ 1.45 |
| VGAE                    | 91.40 $\pm$ 0.01 | 92.60 $\pm$ 0.01 | 90.80 $\pm$ 0.02 | 92.00 $\pm$ 0.02 | 94.40 $\pm$ 0.02 | 94.70 $\pm$ 0.02 | 45.53 $\pm$ 1.87 |
| ARGA                    | 92.40 $\pm$ 0.00 | 93.23 $\pm$ 0.00 | 91.94 $\pm$ 0.00 | 93.03 $\pm$ 0.00 | 96.81 $\pm$ 0.00 | 97.11 $\pm$ 0.00 | 28.39 $\pm$ 2.51 |
| ARVGA                   | 92.40 $\pm$ 0.00 | 92.60 $\pm$ 0.00 | 92.40 $\pm$ 0.00 | 93.00 $\pm$ 0.00 | 96.50 $\pm$ 0.00 | 96.80 $\pm$ 0.00 | 27.32 $\pm$ 2.93 |
| SAGE                    | 86.33 $\pm$ 1.06 | 88.24 $\pm$ 0.87 | 85.65 $\pm$ 2.56 | 87.90 $\pm$ 2.54 | 89.22 $\pm$ 0.87 | 89.44 $\pm$ 0.82 | 54.63 $\pm$ 1.12 |
| SEAL                    | 92.22 $\pm$ 1.12 | 93.12 $\pm$ 1.01 | 93.38 $\pm$ 0.46 | 94.27 $\pm$ 0.26 | 92.99 $\pm$ 0.99 | 94.04 $\pm$ 0.80 | 64.74 $\pm$ 0.43 |
| MGAE                    | 95.05 $\pm$ 0.76 | 94.50 $\pm$ 0.86 | 94.85 $\pm$ 0.49 | 94.68 $\pm$ 0.34 | 98.45 $\pm$ 0.03 | 98.22 $\pm$ 0.05 | 54.74 $\pm$ 1.06 |
| GraphMAE                | 94.88 $\pm$ 0.23 | 93.52 $\pm$ 0.51 | 94.32 $\pm$ 0.40 | 93.54 $\pm$ 0.22 | 96.24 $\pm$ 0.36 | 95.47 $\pm$ 0.41 | 53.97 $\pm$ 0.64 |
| MaskGAE <sub>edge</sub> | 96.42 $\pm$ 0.17 | 95.91 $\pm$ 0.25 | 98.02 $\pm$ 0.22 | 98.18 $\pm$ 0.21 | 98.75 $\pm$ 0.04 | 98.66 $\pm$ 0.06 | 65.84 $\pm$ 0.47 |
| MaskGAE <sub>path</sub> | 96.45 $\pm$ 0.18 | 95.95 $\pm$ 0.21 | 97.87 $\pm$ 0.22 | 98.09 $\pm$ 0.17 | 98.84 $\pm$ 0.04 | 98.78 $\pm$ 0.05 | 65.98 $\pm$ 0.39 |

Table: Link prediction results (%).

### Node Classification

|                         | Cora             | CiteSeer         | Pubmed           | Photo            | Computer         | arXiv            | MAG              |
|-------------------------|------------------|------------------|------------------|------------------|------------------|------------------|------------------|
| MLP                     | 47.90 $\pm$ 0.40 | 49.30 $\pm$ 0.30 | 69.10 $\pm$ 0.20 | 78.50 $\pm$ 0.20 | 73.80 $\pm$ 0.10 | 56.30 $\pm$ 0.30 | 22.10 $\pm$ 0.30 |
| GCN                     | 81.50 $\pm$ 0.20 | 70.30 $\pm$ 0.40 | 79.00 $\pm$ 0.50 | 92.42 $\pm$ 0.22 | 86.51 $\pm$ 0.54 | 70.40 $\pm$ 0.30 | 30.10 $\pm$ 0.30 |
| GAT                     | 83.00 $\pm$ 0.70 | 72.50 $\pm$ 0.70 | 79.00 $\pm$ 0.30 | 92.56 $\pm$ 0.35 | 86.93 $\pm$ 0.29 | 70.60 $\pm$ 0.30 | 30.50 $\pm$ 0.30 |
| GAE                     | 74.90 $\pm$ 0.40 | 65.60 $\pm$ 0.50 | 74.20 $\pm$ 0.30 | 91.00 $\pm$ 0.10 | 85.10 $\pm$ 0.40 | 63.60 $\pm$ 0.50 | 27.10 $\pm$ 0.30 |
| VGAE                    | 76.30 $\pm$ 0.20 | 66.80 $\pm$ 0.20 | 75.80 $\pm$ 0.40 | 91.50 $\pm$ 0.20 | 85.80 $\pm$ 0.30 | 64.80 $\pm$ 0.20 | 27.90 $\pm$ 0.20 |
| ARGA                    | 77.95 $\pm$ 0.70 | 64.44 $\pm$ 1.19 | 80.44 $\pm$ 0.74 | 91.82 $\pm$ 0.08 | 85.86 $\pm$ 0.11 | 67.34 $\pm$ 0.09 | 28.36 $\pm$ 0.12 |
| ARVGA                   | 79.50 $\pm$ 1.01 | 66.03 $\pm$ 0.65 | 81.51 $\pm$ 1.00 | 91.51 $\pm$ 0.09 | 86.02 $\pm$ 0.11 | 67.43 $\pm$ 0.08 | 28.32 $\pm$ 0.18 |
| GraphMAE                | 84.20 $\pm$ 0.40 | 73.40 $\pm$ 0.40 | 81.10 $\pm$ 0.40 | 93.23 $\pm$ 0.13 | 89.51 $\pm$ 0.08 | 71.75 $\pm$ 0.17 | 32.25 $\pm$ 0.37 |
| DGI                     | 82.30 $\pm$ 0.60 | 71.80 $\pm$ 0.70 | 76.80 $\pm$ 0.60 | 91.61 $\pm$ 0.22 | 83.95 $\pm$ 0.47 | 65.10 $\pm$ 0.40 | 31.40 $\pm$ 0.30 |
| GMI                     | 83.00 $\pm$ 0.30 | 72.40 $\pm$ 0.10 | 79.90 $\pm$ 0.20 | 90.68 $\pm$ 0.17 | 82.21 $\pm$ 0.31 | 68.20 $\pm$ 0.20 | 29.50 $\pm$ 0.10 |
| GRACE                   | 81.90 $\pm$ 0.40 | 71.20 $\pm$ 0.50 | 80.60 $\pm$ 0.40 | 92.15 $\pm$ 0.24 | 86.25 $\pm$ 0.25 | 68.70 $\pm$ 0.40 | 31.50 $\pm$ 0.30 |
| GCA                     | 81.80 $\pm$ 0.20 | 71.90 $\pm$ 0.40 | 81.00 $\pm$ 0.30 | 92.53 $\pm$ 0.16 | 87.85 $\pm$ 0.31 | 68.20 $\pm$ 0.20 | 31.40 $\pm$ 0.30 |
| MVGRL                   | 82.90 $\pm$ 0.30 | 72.60 $\pm$ 0.40 | 80.10 $\pm$ 0.70 | 91.70 $\pm$ 0.10 | 86.90 $\pm$ 0.10 | 68.10 $\pm$ 0.10 | 31.60 $\pm$ 0.40 |
| BGRL                    | 82.86 $\pm$ 0.49 | 71.41 $\pm$ 0.92 | 82.05 $\pm$ 0.85 | 93.17 $\pm$ 0.30 | 90.34 $\pm$ 0.19 | 71.64 $\pm$ 0.12 | 31.11 $\pm$ 0.11 |
| SUGRL                   | 83.40 $\pm$ 0.50 | 73.00 $\pm$ 0.40 | 81.90 $\pm$ 0.30 | 93.20 $\pm$ 0.40 | 88.90 $\pm$ 0.20 | 69.30 $\pm$ 0.20 | 32.40 $\pm$ 0.10 |
| CCA-SGG                 | 83.59 $\pm$ 0.73 | 73.36 $\pm$ 0.72 | 80.81 $\pm$ 0.38 | 93.14 $\pm$ 0.14 | 88.74 $\pm$ 0.28 | 69.22 $\pm$ 0.22 | 27.57 $\pm$ 0.41 |
| MaskGAE <sub>edge</sub> | 83.77 $\pm$ 0.33 | 72.94 $\pm$ 0.20 | 82.69 $\pm$ 0.31 | 93.30 $\pm$ 0.04 | 89.44 $\pm$ 0.11 | 70.97 $\pm$ 0.29 | 32.75 $\pm$ 0.43 |
| MaskGAE <sub>path</sub> | 84.30 $\pm$ 0.39 | 73.80 $\pm$ 0.81 | 83.58 $\pm$ 0.45 | 93.31 $\pm$ 0.13 | 89.54 $\pm$ 0.06 | 71.16 $\pm$ 0.33 | 32.79 $\pm$ 0.32 |

Table: Node classification results (%).

- MaskGAE achieves SOTA performance in both link prediction and node classification tasks.

### Ablation Study

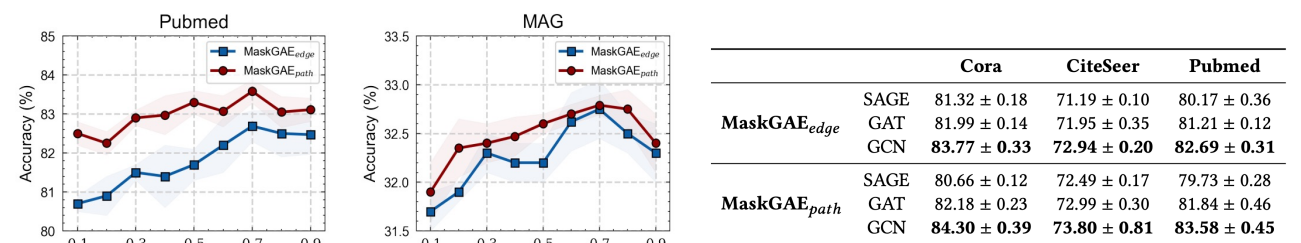

Figure: Ablation analysis on masking ratios. Table: Effect of different encoders

- A properly large masking ratio achieves a good performance.
- MaskGAE with GCN as the encoder exhibits significantly improved performances over GAT and SAGE in all cases.

## Conclusion

- A comprehensive theoretical analysis of GAEs and MGM.
- MaskGAE, a simple yet effective self-supervised learning framework for graphs.
- Path-wise masking, a structured masking strategy to facilitate the MGM task.
- MaskGAE establishes new SOTA performance in different tasks.

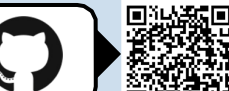

Supplement: supplementary_material [file attachment]
